# Supplementary material for: Computed tomographic analysis of the dental system of three Jurassic ceratopsians and implications for the evolution of tooth replacement pattern and diet in early-diverging ceratopsians
Source: eLife. 2022 Apr 20;11:e76676. doi: 10.7554/eLife.76676 (PMC9068210; doi:10.7554/eLife.76676)
Supplement: Supplementary file 1. [file elife-76676-supp1.xlsx]

## Sheet: Yinlong IVPP V18638
Number of alveous	Total height of functional tooth (mm)		Total height of replacement tooth (mm)		Mesiodistal width of functional tooth (mm)		Mesiodistal width of replacement tooth (mm)		Linguolabial width of functional tooth (mm)		Linguolabial width of replacement tooth (mm)
	left	right	left	right	left	right	left	right	left	right	left	right
Maxilla
1	-	14.61	-	4.57	-	4.18	-	3.2	-	2.73	-	1.15
2	-	16.92	-	1.62	-	4.66	-	1.76	-	3.03	-	0.75
3	-	17.25	-	-	-	4.42	-	-	-	3.18	-	-
4	-	-	-	-	-	-	-	-	-	-	-	-
5	-	18.26	-	-	-	4.82	-	-	-	3.4	-	-
6	-	18.27	-	-	-	4.8	-	-	-	3.54	-	-
7	-	-	-	-	-	-	-	-	-	-	-	-
8	-	21.09	-	-	-	4.82	-	-	-	3.42	-	-
9	-	18.08	-	-	-	5	-	-	-	3.54	-	-
10	-	16.96	-	9.19	-	5.45	-	4.78	-	3.74	-	2.26
11	-	17.41	-	-	-	4.75	-	-	-	3.54	-	-
12	-	-	-	-	-	-	-	-	-	-	-	-
13	-	14.01	-	-	-	3.89	-	-	-	2.48	-	-
* denotes that the tooth is damaged.

## Sheet: Yinlong IVPP V18636
Number of alveous	Total height of functional tooth (mm)		Total height of replacement tooth (mm)		Mesiodistal width of functional tooth (mm)		Mesiodistal width of replacement tooth (mm)		Linguolabial width of functional tooth (mm)		Linguolabial width of replacement tooth (mm)
	left	right	left	right	left	right	left	right	left	right	left	right
Premaxilla
1	-	-	-	-	-	-	-	-	-	-	-	-
2	5.06*	18.4	-	-	-	5.69	-	-	-	4.83	-	-
3	12.35	-	-	-	5.734	-	-	-	4.86	-	-	-
Maxilla
1	5.94*	-	-	-	-	-	-	-	-	-	-	-
2	-	10.67	-	-	-	4.06	-	-	-	3.72	-	-
3	-	5.14*	-	5.65	-	4.79	-	4.65	-	3.76	-	3.36
4	13.22	.8.87*	-	-	4.77	4.93	-	-	4.18	4.07	-	-
5	6.40*	13.9	-	-	4.75	4.96	-	-	4.35	4.32	-	-
6	9.58*	-	-	-	4.92	-	-	-	3.81	-	-	-
7	13.65	15.06	-	-	4.97	5.17	-	-	-	-	-	-
8	11.23	-	-	-	4.87	-	-	-	4.12	-	-	-
9	10.5	13.02	-	-	5.44	5.21	-	-	4.28	4.48	-	-
10	-	14.13	-	6.19	-	5.42	-	5.13	-	4.26	-	1.65
11	-	4.10*	-	-	-	-	-	-	-	-	-	-
Dentary
1	-	-	-	-	-	-	-	-	-	-	-	-
2	-	4.41*	-	-	-	-	-	-	-	-	-	-
3	-	11.93	-	-	-	3.94	-	-	-	2.36	-	-
4	14.82	11.03	-	-	4.73	4.34	-	-	3.73	2.89	-	-
5		15.51	-	-	-	4.66	-	-		3.31	-	-
6	9.5*	9.38*	-	-	5.4	4.94	-	-	4.37	4.28	-	-
7	9.43*	16.82	-	-	5.4	5.4	-	-	4.41	4.36	-	-
8	12.38	9.82*	-	-	5.41	5.41	-	-	4.23	3.92	-	-
9	7.9*	9.35*	-	-	5.44	-	-	-	4.04	-	-	-
10	8.46*	16.08	-	-	5.58	5.84	-	-	4.25	4.56	-	-
11	10.2*	-	-	-	5.62	-	-	-	4.1	-	-	-
12	6.75*	-	-	-	-	-	-	-	-	-	-	-
* denotes that the tooth is damaged.

## Sheet: Yinlong IVPP V14530
Number of alveous	Total height of functional tooth (mm)		Total height of replacement tooth (mm)		Mesiodistal width of functional tooth (mm)		Mesiodistal width of replacement tooth (mm)		Linguolabial width of functional tooth (mm)		Linguolabial width of replacement tooth (mm)
	left	right	left	right	left	right	left	right	left	right	left	right
Premaxilla
1	11.80*	32.93	-	-	-	9.55	-	-	-	8.28	-	-
2	19.88*	36.79	-	-	-	9.1	-	-	-	8.3	-	-
3	19.23*	11.02*	-	-	-	-	-	-	-	-	-	-
Maxilla
1	8.11*	11.92*	-	-	-	-	-	-	-	-	-	-
2	11.21*	20.23	-	-	-	4.69	-	-	-	4.15	-	-
3	15.52*	23.53	-	-	-	6.35	-	-	-	4.39	-	-
4	19.74*	23.96	-	-	-	6.1	-	-	-	4.89	-	-
5	17.74*	20.64	-	-	-	5.44	-	-	-	6.28	-	-
6	22.48	21.05	-	-	6.92	6.33	-	-	5.54	5.16	-	-
7	26.59	24.46	-	-	5.17	5.19	-	-	5.22	4.24	-	-
8	23.4	25.76	-	-	5.48	5.91	-	-	3.87	3.84	-	-
9	17.56	26.07	18.19	14.55	7.55	6.31	7.05	6.59	-	4.8	4.85	5.13
10	23.65	27.17	-	-	6.07	6.1	-	-	5.16	4.71	-	-
11	26.2	25.96	-	-	6.76	7.2	-	-	4.78	4.67	-	-
12	15.39	26.32	-	-	7.19	6.45	-	-	5.33	4.73	-	-
13	19.75	20.09	-	-	5.35	5.3	-	-	5.67	3.68	-	-
Dentary
1	14.18	10.64*	-	-	3.31	-	-	-	-	-	-	-
2	14.35	15.53	-	-	4.2	-	-	-	3.82	-	-	-
3	11.12*	17.71	-	-	-	5.26	-	-	2.36	4.53	-	-
4	17.42*	16.42	-	-	-	3.92	-	-	4.13	-	-	-
5	23.33	21.42	-	-	4.73	5.21	-	-	3.4	5.24	-	-
6	21.76	22.9	-	-	5.1	4.91	-	-	3.54	-	-	-
7	22.61	25.22	-	-	4.8	6.35	-	-	3.99	4.94	-	-
8	23.53	26.31	-	-	-	5.57	-	-	3.1	4.73	-	-
9	19.05*	25.92	-	-	-	5.69	-	-	-	4.3	-	-
10	20.74	24.06	-	-	5.91	6.74	-	-	-	5.58	-	-
11	19.65	21.44	-	-	5.38	7.31	-	-	4.36	5.84	-	-
12	21.71	22.56	-	-	6.3	-	-	-	4.29	-	-	-
13	13.44*	20.27	10.91	-	-	5.54	6.43	-	-	4.48	4.65	-
14	21.09	19.25	-	-	5.43	6.96	-	-	4.48	3.65	-	-
15	15	-	-	-	5.52	-	-	-	3.45	-	-	-
* denotes that the tooth is damaged.

## Sheet: Yinlong IVPP V18637
Number of alveous	Total height of functional tooth (mm)		Total height of replacement tooth (mm)		Mesiodistal width of functional tooth (mm)		Mesiodistal width of replacement tooth (mm)		Linguolabial width of functional tooth (mm)		Linguolabial width of replacement tooth (mm)		Height of teeth remnant (mm)
	left	right	left	right	left	right	left	right	left	right	left	right	left	right
Premaxilla
1	26.88	16.8	10.58	-	7.7	6.83	8.8	-	4.99	6.09	2.78	-	-	-
2	-	13.38*	2.47	-	-	-	3.08	-	-	-	1.67	-	-	-
3	19.09	6.33*	-	-	4.54	-	-	-	3.45	-	-	-	-	-
Maxilla
1	-	10.69*	-	-	-	-	-	-	-	-	-	-	-	-
2	-	16.05*	-	-	-	-	-	-	-	-	-	-	-	-
3	-	15.12*	-	-	-	-	-	-	-	-	-	-	-	-
4	-	10.97*	-	-	-	5.42	-	-	-	4.07	-	-	-	-
5	20.14*	17.78*	-	-	-	-	-	-	-	-	-	-	-	-
6	-	16.16*	-	-	-	-	-	-	-	-	-	-	-	-
7	-	16.14*	-	6.62	-	-	-	4.62	-	-	-	1.62	-	-
8	-	15.26*	-	-		-	-	-	-	-	-	-	-	-
9	19..28*	9.73*	-	-	4.63	-	-	-	3.16	-	-	-	-	-
10	19.78*	16.93	-	-	5.4	-	-	-	4.32	-	-	-	-	-
11	18.67*	14.35*	-	-	5.06	-	-	-	4.26	-	-	-	-	6.83
12	19.33*	16.99*	-	-	-	-	-	-	3.96	-	-	-	-	-
13	19.57	21.15*	-	-	5.06	-	-	-	3.85	-	-	-	-	-
14	15.36*	18.03	2.92	-	5.12	5.64	1.8	-	3.54	3.85	0.83	-	-	3.62
* denotes that the tooth is damaged.

## Sheet: Chaoyangsaurus IGCAGS V371
Number of alveous	Total height of functional tooth (mm)		Total height of replacement tooth (mm)		Mesiodistal width of functional tooth (mm)		Mesiodistal width of replacement tooth (mm)		Linguolabial width of functional tooth (mm)		Linguolabial width of replacement tooth (mm)
	left	right	left	right	left	right	left	right	left	right	left	right
Premaxilla
1	13.44	14.31	4.23	-	-	-	2.82	-	-	-	1.91	-
2	14.27	10.74*	-	-	3.36	3.49	-	-	2.81	2.99	-	-
Maxilla
1	7.25*	6.63*	-	-	-	-	-	-	-	-	-	-
2	3.51*	6.67*	-	-	-	-	-	-	-	2.97	-	-
3	17.74	16.85	1.31	4.05	5.33	5.25	2.49	5.68	3.61	3.65	1.58	-
4	17.97	16.08	-	-	5.53	5.48	-	-	3.85	3.9	-	-
5	12.65	18.13	6.33	-	5.34	5.91	5.35	-	4.03	4.2	4.49	-
6	18.7	19.02	-	-	5.91	5.64	-	-	4.11	4.42	-	-
7	18.32	17.87	-	-	5.92	5.9	-	-	4.17	4.6	-	-
8	10.87	10.51	7.89	6.4	5.01	5.84	6.2	6.65	-	-	4.53	3.93
9	14.95	15.54	-	-	5.22	5.33	-	-	3.17	3.2	-	-
Dentary
1	-	7.52*	-	-	-	-	-	-	-	-	-	-
2	9.11	8.6	-	1.21	2.72	-	-	1.5	1.37	-	-	-
3	9.7	11.98	-	-	3.67	3.72	-	-	1.66	1.78	-	-
4	10.89	11.2	3.87	-	4.4	4.42	4.56	-	2.73	2.79	2.42	-
5	9.38*	18.69	-	-	-	4.99	-	-	-	3.72	-	-
6	4.97	4.57	5.8	6.72	4.24	4.11	5.79	5.12	-	2.97	3.34	2.92
7	17.62	18.69	-	-	5.57	5.87	-	-	4.21	4	-	-
8	17.2	15.4	-	-	5.72	5.24	-	-	4	4.03	-	-
9	12.28	15.82	2.92	3.18	4.54	5.7	3.91	5.12	4.1	4.04	2.4	1.18
10	11.13	14.11	-	0.67	-	5.03	-	1.31	-	3.22	-	-
11	-	10.38	-	2.36	-	3.39	-	2.87	-	2.14	-	1.14
* denotes that the tooth is damaged.

## Sheet: Hualianceratops IVPP V28614
Number of alveous	Total height of functional crown (mm)		Mesiodistal width of functional crown (mm)		Linguolabial width of functional crown (mm)
	left	right	left	right	left	right
Maxilla
1	-	-	-	-	-	-
2	5.17	-	4.96	-	3	-
3	4.82	-	4.81	-	3.67	-
4	5.36	-	5.26	-	3.95	-
5	5.15	-	4.77	-	4.68	-
6	5.31	-	5.61	-	4.04	-
7	6.22	-	5.66	-	4.32	-
8	-	-	-	-	-	-
9	5.28	-	5.55	-	4.35	-
10	-	-	-	-	-	-
* denotes that the tooth is damaged.
